# Supplementary material for: Exploring the protective effect ofGynura procumbensagainst type 2 diabetes mellitus by network pharmacology and validation in C57BL/KsJ db/db mice
Source: Royal Society of Chemistry journal article supplement (doi:10.1039/d0fo01188f), 2021-01-01

Supplementary Figure

Supplementary Figure 1 A tentative identification of 16 target compounds of GP by UHPLC-Q-TOF-MS

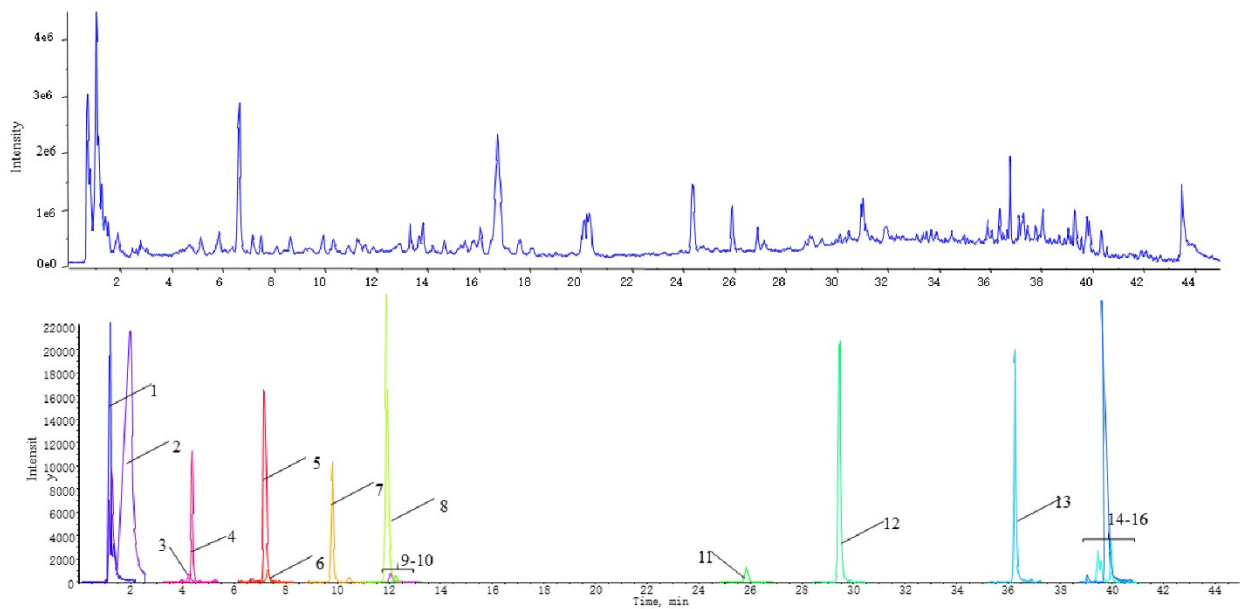

Supplement: d0fo01188f1.pdf [file d0fo01188f1.pdf]
